# Supplementary material for: The Functional Significance of High Cysteine Content in Eye Lens γ-Crystallins
Source: MDPI journal article supplement (doi:10.3390/biom14050594), 2024-05-17
Supplement: s1 [file s1]

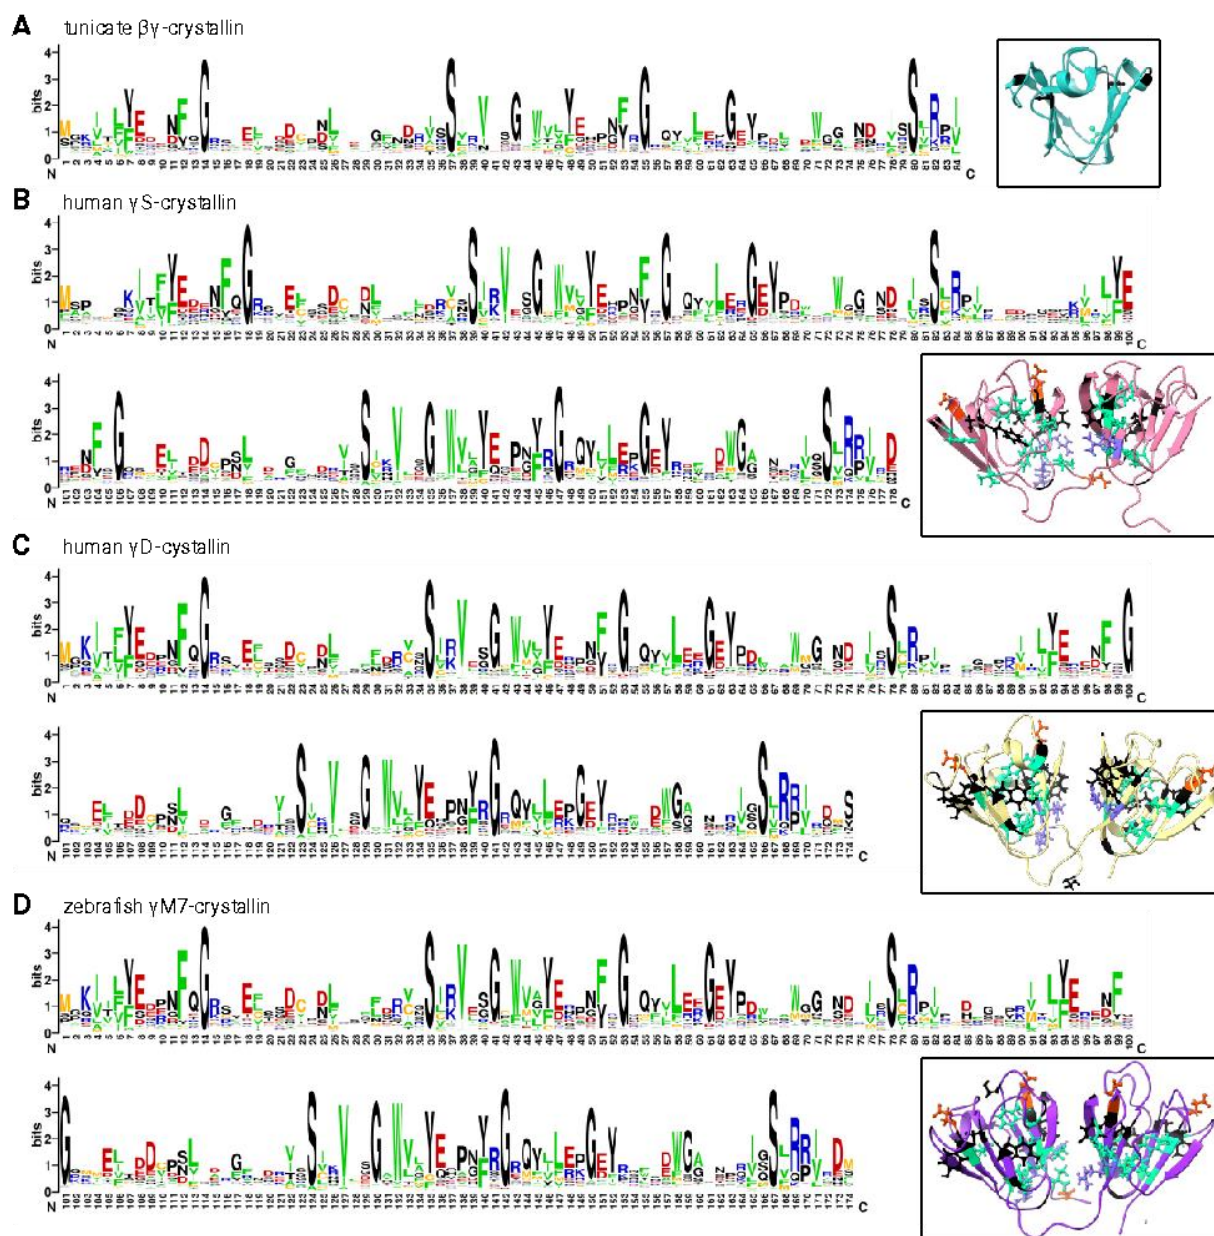

**Figure S1.** Multiple sequence alignment. The Deep MSA tool was used to identify conserved residues starting with **A** tunicate  $\beta\gamma$ -crystallin **B** human  $\gamma$ S-crystallin **C** human  $\gamma$ D-crystallin and **D** zebrafish  $\gamma$ M7-crystallin. In all cases, the most common conserved residues are serine and glycine, along with the tryptophans commonly found in the hydrophobic core of each Greek key domain, the tyrosines associated with the tyrosine corners, and charged residues on the surface. Insets show the structure of each protein with strongly conserved residues highlighted. Cysteine and methionine are generally not among the more strongly conserved residues.

A0A9J7L863\_BRAFL --MATNSISI YDEEGLRGTK HTFTDTVADV P--AGQNSCF SIKVTSGEWL VYSYNDFEGT SIRLPTGIYP DPGHIRSNHV NPANTTWNDM VRSLRPVRQD  
 F6Q2R9\_CIOIN ----MGKIIL FEDVEFGGKK LELETSVSDI NVHGFNDIVS SIIVESGTWF VFDEEGFSGP SYKLTPGKYP NPGSWGNG-- ----DDE LSSVKQ--  
 S4REP0\_PETMA TLGCAPIIF FEERDFKGRR FEYSQDCNM A--SNLSRON SIRVEGGAWV IYERPDFKGN MYIMEPGEYP EYQRWNGY-- ----NDH IGSRSIRGV  
 A0A8C4N311\_EPTBU ----KIQVVL YEEEFECGRS QE--MCVTI A--IYLF-- ----VCSWV IYEEPGFQGR QLLLEEGERP RPSAWNGY-- ----SGR LGSIRPICCV

A0A9J7L863\_BRAFL AVTLYDKDD- ---FCGAEQV VTCD--PDV EMDNCCSVVI RGGWWSLYPY GSYSGGYPPS NTEKTMGPNG YRVQLVAGGE TITIGSIKKV ECPYDPFFLT  
 F6Q2R9\_CIOIN ----MGKIIL FEDVEFGGKK LELETSVSDI NVHGFNDIVS SIIVESGTWF VFDEEGFSGP SYKLTPGKYP NPGSWGNG-- ----DDE LSSVKQ--  
 S4REP0\_PETMA SIPTCGQCTG GGEIEGAERK EDCPHLHDF NRMEVRSVRV HDGAWVAYEE PHYRGR-- --QYLLEKGD YRKSEYAGM SPTMQSVRCI RRF-----  
 A0A8C4N311\_EPTBU SSTFHN----- ----HLLS STRVVPHEYL EGRWVAYEE ANFCGE-- --QYLLEKGD YRSHLDWGGG DPSIGSVRPV FLVRLPMTMK

A0A9J7L863\_BRAFL PFFPGTTVGP FHHVLPL  
 F6Q2R9\_CIOIN -----  
 S4REP0\_PETMA -----  
 A0A8C4N311\_EPTBU LHF-----

Figure S2. Sequence alignment for  $\gamma$ -crystallin Cluster 1 ( $\beta\gamma$ -crystallins).

A0A8V0Z9D9\_CHICK -----LSR AVTFYEDKNF LGRRYECDD CDPFHTYLSR CNSIRVEGGT WVAYERPNYS GNMVVLRRGE YPDYHHWMLG NDRLGSKAV HIPSGAQGHI  
 A0A151NH35\_ALLMI MTIDFALVGF QVTFYEDKNF QGRRYECDD CDPFHTYLSR CNSIRVQGA WVAYERPNFS GNTYVLTGPE YPDYQHWMLG NDRLSSCKAI QIPSGGQSI  
 Q5XTP1\_DANRE -----MG KIVFFEDKNF QGRRYECDD CDPFHTYLSR CNSIRVESGA WVAYERPNYT GNRVLLTRGE YPEYLGWMLG NDRLSSCKII RFTSGMQYKV  
 H2ZWR5\_LATCH ----VSLFFQ QITFYEDKNF QGRRYECDD CDPFHTYLSR CNSIRVENGA WVAYERPNYG GYMYVLNRGE YPEYQHWMLG NDRLSSCKMI HFSSGSQYKI  
 E9QE97\_DANRE ----MGRVST KIIFEDKNF QGRRYECDD CDPFHTYLSR CNSIRVESGA WVAYERPNFI GYQYVLTGPE YPDYQHWMLG NDRLSSCKMI HFVSGSEHKI  
 A0A803TS30\_ANOCA ---MGSSPDK TITFYEGKNF QGRRYECDD CLDFHTYLSR CNSIRVEGGA WVAYERPNFA GNMVVLTHGD YPEYQHWMLG NDRLSSCKYI QLSGGQYKI  
 CRYGS\_MACFL ----MSKSVK KITFYEDKNF QGRRYECDD CDPFHTYLSR CNSIRVTGGA WVAYERPNFS GNMVILTGDD YPDYHHWMLG NDRLSSCKVI HSSGGQYKI  
 F6SLN9\_ORNAN ----MSKTGA KITFYEDKNF QGRRYECDD SADFHTYLSR CNSIRVDGGA WVAYERPNFA GAMVVLTRGE YPDYQHWMLG SDRLGSKAI HSSGGQYKI  
 CRYGS\_MOUSE ----MSKTGG KISFYEDKNF QGRRYECDD CADFRSYLSR CNSIRVEGGT WAVAYERPNFS GHMYILPQGE YPEYQHWMLG NDRLGSKRAV HSSGGQAKI  
 CRYGS\_BOVIN ----MSKAGT KITFYEDKNF QGRRYECDD CADFRSYLSR CNSIRVEGGT WAVAYERPNFA GYMYILPQGE YPEYQHWMLG NDRLSSCKRAV HSSGGQYKI  
 CRYGS\_HUMAN ----MSKTGT KITFYEDKNF QGRRYECDD CDPFHTYLSR CNSIRVEGGT WAVAYERPNFA GYMYILPQGE YPEYQHWMLG NDRLSSCKRAV HLPSSGGQYKI

A0A8V0Z9D9\_CHICK QVFEKGFSG QMFATEDCP SILEECHFRE VHACRVLEGI WVFYEHFNIR GRQYLLPKGE YRQPVWGA VTPAVQSFRRS AE  
 A0A151NH35\_ALLMI QIFEKGFSG QMFATEDCP SVMDEFHMR IHACKVLGGV WVFYEHFNIR GRQYLLEKGE YRKPVEWGA VTPAVQSFRCI VE  
 Q5XTP1\_DANRE QLYDKPDFTG QAIESIEDCP SVQERFLRE VNSCKVLDGY WIFYEHPNIR GHQYFLKGN YRKPVDWGA CPSVQSFRRF TE  
 H2ZWR5\_LATCH QVFDKGNFAG QMFATEDCP SVMERFRIR IHACKVLEGV WVFYEHFNIR GRQYLLEKGE YRKPVDWGA CPTVQSFRRR ME  
 E9QE97\_DANRE QLYDKGFAG QVYETDDCP SVVERFRTRE VHSCKVLDGI WIFYEHPNIR GRQYLLKGE YRKPVDWGA CPTVQSFRRR TE  
 A0A803TS30\_ANOCA QFWEKGFSG QMYETDDCP SVMQFHLRE IHSCKVLDG VVFYEQPNY GRQYFLKGE YRKPVEWGA SPVVQSFRRV AE  
 CRYGS\_MACFL QIFEKGFSG QMYETDDCP SVMQFHLRE IHSCKVLDG VVFYEQPNY GRQYFLKGE YRKPVDWGA CAVQSFRRR ME  
 F6SLN9\_ORNAN QIFEKGFSG QMFATEDCP SVLEQFHLRE IHSCKVLEGV WVFYEQPNY GRQYLLDKE YRKPVDWAA GPTVQSFRRV VE  
 CRYGS\_MOUSE QVFEKGFNG QMYETDDCP SIMEQFHLRE IHSCKVLEGT WIFYELPNIR GRQYLLDKE YRKPVDWGA SPAIQSFRRR VE  
 CRYGS\_BOVIN QIFEKGFNG QMYETDDCP SIMEQFHLRE VHSCKVLEGA WIFYELPNIR GRQYLLDKE YRKPVDWGA SPAVQSFRRR VE  
 CRYGS\_HUMAN QIFEKGFSG QMYETDDCP SIMEQFHLRE IHSCKVLEGV WIFYELPNIR GRQYLLDKE YRKPVDWGA SPAVQSFRRR VE

Figure S3. Sequence alignment for  $\gamma$ -crystallin Cluster 2 ( $\gamma$ S-like crystallins).

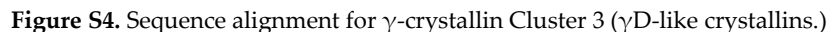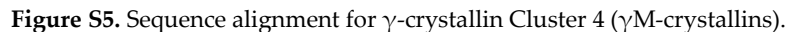



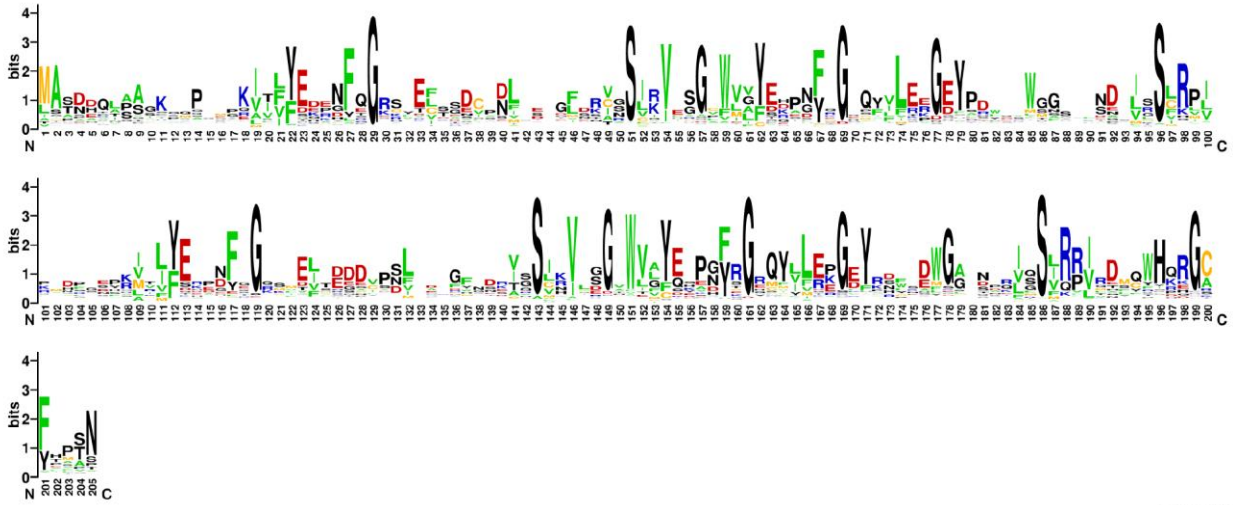

**Figure S6.** Multiple sequence alignment. The Deep MSA tool was used to identify conserved residues starting with human  $\beta$ 2-crystallin. As for the  $\gamma$ -crystallins, the most common conserved residues are mostly serine, glycine, and aromatic residues, and not cysteine or methionine.

**Table S1:** Cysteine and methionine content of  $\beta$ -crystallins in representative vertebrates.

| organism                          | protein                    | UniProt ID           | method | length | Cys<br>(no./%) | Met<br>(no./<br>%) |
|-----------------------------------|----------------------------|----------------------|--------|--------|----------------|--------------------|
| <i>Mus musculus</i>               | $\beta$ A1-crystallin      | CRBA1_MOUSE          | x      | 198    | 8/4.0          | 4/2.0              |
| <i>Ornithorhynchus anatinus</i>   | $\beta$ A1-crystallin      | F7BTY4_ORNAN         | x      | 204    | 10/4.9         | 5/2.5              |
| <i>Danio rerio</i>                | $\beta$ A1-crystallin      | Q567D9_DANRE         | x      | 199    | 11/5.5         | 8/4.0              |
| <i>Danio rerio</i>                | $\beta$ A1-crystallin      | Q6DH14_DANRE         | x      | 196    | 7/3.6          | 9/4.6              |
| <i>Danio rerio</i>                | $\beta$ A1b-crystallin     | Q6DGY4_DANRE         | x      | 198    | 12/6.0         | 12/6.0             |
| <i>Danio rerio</i>                | $\beta$ A1c-crystallin     | B5M4A7_DANRE         | x      | 206    | 10/4.9         | 8/3.9              |
| <i>Latimeria chalumnae</i>        | $\beta$ A1-crystallin      | H3AXI2_LATCH         | x      | 199    | 10/5.0         | 12/6.0             |
| <i>Latimeria chalumnae</i>        | $\beta$ A1-crystallin-like | H2ZY80_LATCH         | x      | 213    | 9/4.2          | 13/6.1             |
| <i>Anolis carolinensis</i>        | $\beta$ A1-crystallin      | H9GJE8_ANOCA         | x      | 215    | 4/1.9          | 7/3.3              |
| <i>Gallus gallus</i>              | $\beta$ A2-crystallin      | CRBA2_CHICK          | x      | 196    | 3/1.5          | 4/2.0              |
| <i>Alligator mississippiensis</i> | $\beta$ A2-crystallin      | A0A151NRA2_A<br>LLMI | x      | 208    | 4/1.9          | 3/1.4              |
| <i>Latimeria chalumnae</i>        | $\beta$ A2-crystallin      | H3B2W8_LATCH         | x      | 213    | 7/3.3          | 6/2.8              |
| <i>Danio rerio</i>                | $\beta$ A2-crystallin      | Q6DGY2_DANRE         | x      | 197    | 8/4.1          | 7/3.6              |
| <i>Danio rerio</i>                | $\beta$ A2-crystallin      | Q6IQU2_DANRE         | x      | 197    | 8/4.1          | 9/4.6              |
| <i>Macropus fuliginosis</i>       | $\beta$ A2-crystallin      | CRBA2_MACFL          | x      | 197    | 4/2.0          | 2/1.0              |
| <i>Ornithorhynchus anatinus</i>   | $\beta$ A2-crystallin      | A0A6I8NZG8_O<br>RNAN | x      | 241    | 4/1.6          | 4/1.6              |
| <i>Bos taurus</i>                 | $\beta$ A2-crystallin      | CRBA2_BOVIN          | x      | 197    | 4/2.0          | 1/0.5              |
| <i>Mus musculus</i>               | $\beta$ A2-crystallin      | CRBA2_MOUSE          | x      | 197    | 7/3.6          | 1/0.5              |
| <i>Homo sapiens</i>               | $\beta$ A2-crystallin      | CRBA2_HUMAN          | x      | 197    | 6/3.0          | 1/0.5              |

|                                   |                     |                      |   |     |        |        |
|-----------------------------------|---------------------|----------------------|---|-----|--------|--------|
| <i>Gallus gallus</i>              | βA3-crystallin      | CRBA1_CHICK          | x | 215 | 7/3.3  | 7/3.3  |
| <i>Alligator mississippiensis</i> | βA3-crystallin      | A0A151N992_A<br>LLMI | x | 215 | 6/2.8  | 6/2.8  |
| <i>Homo sapiens</i>               | βA3-crystallin      | CRBA1_HUMAN          | x | 215 | 5/2.3  | 6/2.8  |
| <i>Bos taurus</i>                 | βA3-crystallin      | CRBA1_BOVIN          | x | 215 | 8/3.7  | 6/2.8  |
| <i>Alligator mississippiensis</i> | βA4-crystallin      | A0A151MUM2_A<br>LLMI | x | 260 | 14/5.4 | 3/1.2  |
| <i>Gallus gallus</i>              | βA4-crystallin      | CRBA4_CHICK          | x | 196 | 7/3.6  | 1/0.5  |
| <i>Homo sapiens</i>               | βA4-crystallin      | CRBA4_HUMAN          | x | 196 | 5/2.5  | 2/1.0  |
| <i>Mus musculus</i>               | βA4-crystallin      | CRBA4_MOUSE          | x | 196 | 4/2.0  | 2/1.0  |
| <i>Latimeria chalumnae</i>        | βA4-crystallin      | H3ASM1_LATCH         | x | 205 | 9/4.4  | 7/3.4  |
| <i>Danio rerio</i>                | βA4-crystallin      | Q52JI7_DANRE         | x | 196 | 11/5.6 | 5/2.6  |
| <i>Danio rerio</i>                | βB1-crystallin      | A7E2K5_DANRE         | x | 221 | 9/4.1  | 15/6.8 |
| <i>Danio rerio</i>                | βB1-crystallin      | E7F8M1_DANRE         | x | 219 | 9/4.1  | 16/7.3 |
| <i>Danio rerio</i>                | βB1-crystallin-like | A7E2I4_DANRE         | x | 208 | 8/3.8  | 12/5.8 |
| <i>Danio rerio</i>                | βB1-crystallin      | Q6DGZ8_DANRE         | x | 232 | 9/3.9  | 12/5.2 |
| <i>Latimeria chalumnae</i>        | βB1-crystallin      | H3A1B8_LATCH         | x | 219 | 10/4.6 | 14/6.4 |
| <i>Latimeria chalumnae</i>        | βB1-crystallin      | H3AWX7_LATCH         | x | 211 | 10/4.7 | 10/4.7 |
| <i>Latimeria chalumnae</i>        | βB1-crystallin      | H3AS10_LATCH         | x | 254 | 11/4.3 | 9/3.5  |
| <i>Gallus gallus</i>              | βB1-crystallin      | CRBB1_CHICK          | x | 238 | 5/2.1  | 8/3.4  |
| <i>Alligator mississippiensis</i> | βB1-crystallin      | A0A151MUJ3_A<br>LLMI | x | 238 | 3/1.3  | 6/2.5  |
| <i>Bos taurus</i>                 | βB1-crystallin      | CRBB1_BOVIN          | x | 253 | 4/1.6  | 5/2.0  |
| <i>Mus musculus</i>               | βB1-crystallin      | CRBB_MOUSE           | x | 250 | 4/1.6  | 5/2.0  |

---

|                                   |                       |                      |   |     |       |       |
|-----------------------------------|-----------------------|----------------------|---|-----|-------|-------|
| <i>Homo sapiens</i>               | $\beta$ B1-crystallin | CRBB1_HUMAN          | x | 252 | 1/0.4 | 4/1.5 |
| <i>Latimeria chalumnae</i>        | $\beta$ B2-crystallin | H3AY34_LATCH         | x | 205 | 4/2.0 | 1/0.5 |
| <i>Gallus gallus</i>              | $\beta$ B2-crystallin | BRBB2_CHICK          | x | 219 | 3/1.4 | 2/0.9 |
| <i>Alligator mississippiensis</i> | $\beta$ B2-crystallin | A0A151NSD4_A<br>LLMI | x | 204 | 3/1.5 | 1/0.5 |
| <i>Macropus fuliginosis</i>       | $\beta$ B2-crystallin | B2ZF66_MACFL         | x | 205 | 1/0.5 | 2/1.0 |
| <i>Ornithorhyncus anatinus</i>    | $\beta$ B2-crystallin | F7A5Y5_ORNAN         | x | 187 | 3/1.6 | 1/0.5 |
| <i>Danio rerio</i>                | $\beta$ B2-crystallin | Q52JI4_DANRE         | x | 208 | 6/2.9 | 1/0.5 |
| <i>Homo sapiens</i>               | $\beta$ B2-crystallin | CRBB2_HUMAN          | x | 205 | 1/0.5 | 2/1.0 |
| <i>Bos taurus</i>                 | $\beta$ B2-crystallin | CRBB2_BOVIN          | x | 205 | 2/1.0 | 2/1.0 |
| <i>Mus musculus</i>               | $\beta$ B2-crystallin | CRBB2_MOUSE          | x | 205 | 2/1.0 | 3/1.5 |
| <i>Danio rerio</i>                | $\beta$ B3-crystallin | Q52JI3_DANRE         | x | 259 | 4/1.5 | 3/1.2 |
| <i>Latimeria chalumnae</i>        | $\beta$ B3-crystallin | H3AXG5_LATCH         | x | 211 | 2/0.9 | 5/2.4 |
| <i>Gallus gallus</i>              | $\beta$ B3-crystallin | CRBB3_CHICK          | x | 211 | 1/0.5 | 4/1.9 |
| <i>Ornithorhyncus anatinus</i>    | $\beta$ B3-crystallin | F6Z4S4_ORNAN         | x | 211 | 3/1.4 | 1/0.5 |
| <i>Homo sapiens</i>               | $\beta$ B3-crystallin | CRBB3_HUMAN          | x | 211 | 2/0.9 | 1/0.5 |
| <i>Mus musculus</i>               | $\beta$ B3-crystallin | CRBB3_MOUSE          | x | 211 | 3/1.4 | 1/0.5 |
| <i>Bos taurus</i>                 | $\beta$ B3-crystallin | CRBB3_BOVIN          | x | 211 | 2/0.9 | 2/0.9 |

---

```

A0A9J7L863_BRAFL  ----- --MATNSISI YDEEGLRGTK HTFTDTVADV PA--GQNSCF SIKVTSGEWL
A0A8C4N311_EPTBU ----- --KIQVVL YEEEFGRS QEMVTLA-- ----- IYLFVSSWV
F6Q2R9_CIOIN ----- --MGKILL FEDVEFGGKK LELETSVSDL NVHGFNDIVS SIIVESGTFW
S4REP0_PETMA ----- TLGAPQIIF FEERDFGKRR FEYSQDCNM AS--NLSRCN SIRVEGGAWV
A0A6I8NZG8_ORNAN MRLLRGREGS VVAGEHEDES EMDKGSIVSG TQAQEQREQE HIRSMSSISP QDSGRARLTL WEEEFQGRR CELIGDCPSI RDRSGFRVR SVKVESGAWV
CRBA2_MACFL ----- --VAGEHEDES ----- --MSCTL ----- QGSSPARLTL WEEENFQGRR CELMSDCSSI RELSGFRVR SVKVESGAWV
CRBA2_BOVIN ----- --MSSAPA QGPAPASLTL WDEEDFQGRR CRLISDCANI GERGGLRVR SVKVENGAWV
CRBA2_MOUSE ----- --MSSAPA PGSAPVCLTL WDEEDFQGRR CRLISDCANV CERGALRRVR SVKVENGAWV
CRBA2_HUMAN ----- --MSSAPA PGAPASLTL WDEEDFQGRR CRLISDCANV CERGGLPRVR SVKVENGAWV
H3B2W8_LATCH ----- --WPAFLNIS ----- --EVEKR SDFKMTTQQI ETMGQWKITV WEEENFQGRR CEFMMECPNI MER-GFHKIR SVKVECGPWV
CRBA2_CHICK ----- ----- ----- --MTSEAM DTLGQYKITV WEEENFQGRR CEFLECPNI MER-GFRKIR SIKVENGPWV
A0A151NRA2_ALLMI ----- --MRG ----- --LRVCS KGIAMTTQAM DTLGQYKITV WEEENFQGRR CEFLECPNI LER-GFRKIR SIKVENGPWV
Q6DGY2_DANRE ----- ----- ----- --MNPQEQ EQRGKFRMTV FEEEHFQGRS CEFSECPNI LER-DFRKIR SIKVENGPWV
Q6IQU2_DANRE ----- ----- ----- --MNQREQ EQQ-QMRITV WEEENFQGRR CEFLECPNI LER-DFQKIR SIKVNDGPWV

A0A9J7L863_BRAFL VVSYNDEFT SIRLPTGIYP DPGHIRSNHV NPANTTWNDM VRSIRPVVRQ- ---DAVTLY DKDDFCGAE- ---QVVTDD PDVE---M DNCCSVVIRG
A0A8C4N311_EPTBU IYEEPGFQGR QLLLEEGEFP RPSAWGGYSG R----- LGSIRPICCV SSTFHNHL----- LSST RVVPEHYLEG
F6Q2R9_CIOIN VFDDEGFSGP SYKLTGKYP NPGSWGND E-----LSS-----VRQQ-----
S4REP0_PETMA IYERPDFGN MYIMEPEYYP EYQRWGYND H-----IGSRSIRGV S-----IP TQG TGGGE EGAERKEDC PHLH-DRFNM REVRSVRVHD
A0A6I8NZG8_ORNAN GFEPDFQGG QFILEKGDYP CWLAWSGSSG Y-----HTDQ LLSFRLLICA NHSDSRVTLF EGENFQGG-- --KFEVNDDY PSLPAMGWT SVVGSIMVGS
CRBA2_MACFL GFEPDFQGG QFILEKGDYP RSTAWSGSSG Y-----RTDQ LLSFRPILCA NHSDSRVTLF EGENFQGG-- --KFELSDDY PSLPAMGWAS KDVGSLKVT
CRBA2_BOVIN AFEYPDFQGG QFILEKGDYP RWSAWSGSAG H-----HSDQ LLSFRPVLCA NHSDSRVTLF EGENFQGG-- --KFEVNDDY PSLPAMGWAS KDVGSLKVT
CRBA2_MOUSE AFEYPDFQGG QFILEKGDYP CWSAWSGSSG H-----HSNQ LLSFRPVLCA NHSDSRVTLF EGENFQGG-- --KFELSDDY PSLPAMGWT KDVGSLKVT
CRBA2_HUMAN AFEYPDFQGG QFILEKGDYP RWSAWSGSSS H-----NSNQ LLSFRPVLCA NHSDSRVTLF EGENFQGG-- --KFELSDDY PSLPAMGWAS KDVGSLKVT
H3B2W8_LATCH GFEPDFQGG QFILEKGDYP RWEAWSGNSG Y-----RTEH LLSFRPVKCA NHSDSKVTLF EGENFQGR-- --KFELDDY PSLPAMGWGN KEVASIKVNS
CRBA2_CHICK GFEPDFQGG QFILEKGDYP RWEAWSGNSG Y-----RTEH LLSFRPVKCA NHSDSKVTLF EGENFQGH-- --KFELSDDY PSLPAMGWGN KEVASIKVNA
A0A151NRA2_ALLMI GFEPDFQGG QFILEKGDYP RWEAWSGSSG Y-----RTEH LLSFRPVKCA NHSDSKVTLF EGENFQGR-- --KFELSDDY PSLPAMGWGT KEVASIKVNS
Q6DGY2_DANRE GFEYDFQGR QFILEKGDYP CYQAWSGNSG Y-----RTEH MLSFRPVKCA NHSDSKITLY E-EDFMGR-- --KFEMEDY PSIQAMGWCS KEVPSIKVNS
Q6IQU2_DANRE GFEYDFQGG QFILEKGDYP CYQAWSGNS Y-----RTEH MLSFRPVKCA NHSDSKITLY E-EDMMGR-- --KFEMEDY PSIQAMGWCS KEVPSIKVNS

A0A9J7L863_BRAFL GWSLYPYGS YSGGYPSNT EKTMGPGNYR VQLVAGGETI T--IGSIKKV ECPYDPFPLT PFPPTTVGP FHHVLP
A0A8C4N311_EPTBU CRWVAYEEN FGEQYIL-- ER---GLYR SHLDWGGSDP S--IGSVRPV FLVRLPMTMK LHFI-----
F6Q2R9_CIOIN GAWVAYEEPH YRGRQYLL-- EK----GDYR KCEYGA MSP T--MQSVRCI RRF-----
S4REP0_PETMA GAWVAYQYPG YRGEQYVL-- ERDRHSGEFR KYSELTQAH TGQIQSIRRI QQ-----
A0A6I8NZG8_ORNAN GAWVAYQYPG FRGYQYVL-- EQDRHSGEFR KYSELTQAH TNQLQSIRRV QH-----
CRBA2_MACFL GAWVAYQYPG YRGEQYVL-- ERDRHSGEFR NYSEFTQAH TGQLQSIRRV QH-----
CRBA2_BOVIN GAWVAYQYPG YRGEQYVL-- ERDRHSGEFR TYSEFTQAH TGQLQSIRRV QH-----
CRBA2_MOUSE GAWVAYQYPG YRGEQYVL-- ERDRHSGEFR TYSEFTQAH TGQLQSIRRV QH-----
CRBA2_HUMAN GAWVAYQYPG YRGEQYVL-- ERDRHSGEFR TYSEFTQAH TGQLQSIRRV QH-----
H3B2W8_LATCH GAWVAYQYPG YRGEQYVL-- ERDRHSGEFR NYNEYSTQAH TNQLQSIRRI QH-----
CRBA2_CHICK GAWVAYQYPG YRGEQYVL-- ERDRQNGEFK KYSEYSSQAH TNQLQSIRRI QH-----
A0A151NRA2_ALLMI GAWVAYQYPG YRGEQYIL-- ERDRQNGEFK KYIEYSSQAH TNQLQSIRRV QH-----
Q6DGY2_DANRE GAWVGYQFG YRGEQYIF-- ERDRHGEYR CYNDFGTQAH TNQLQSMRRI QQ-----
Q6IQU2_DANRE GAWVGYQFG YRGEQYIF-- ERDRRQGEYR KYIEFTQAH SNQLQSMRRI QH-----

```

**Figure S7.** Sequence alignment for  $\beta$ -crystallin Cluster 1 ( $\beta\gamma$  and  $\beta$ A2-crystallins).



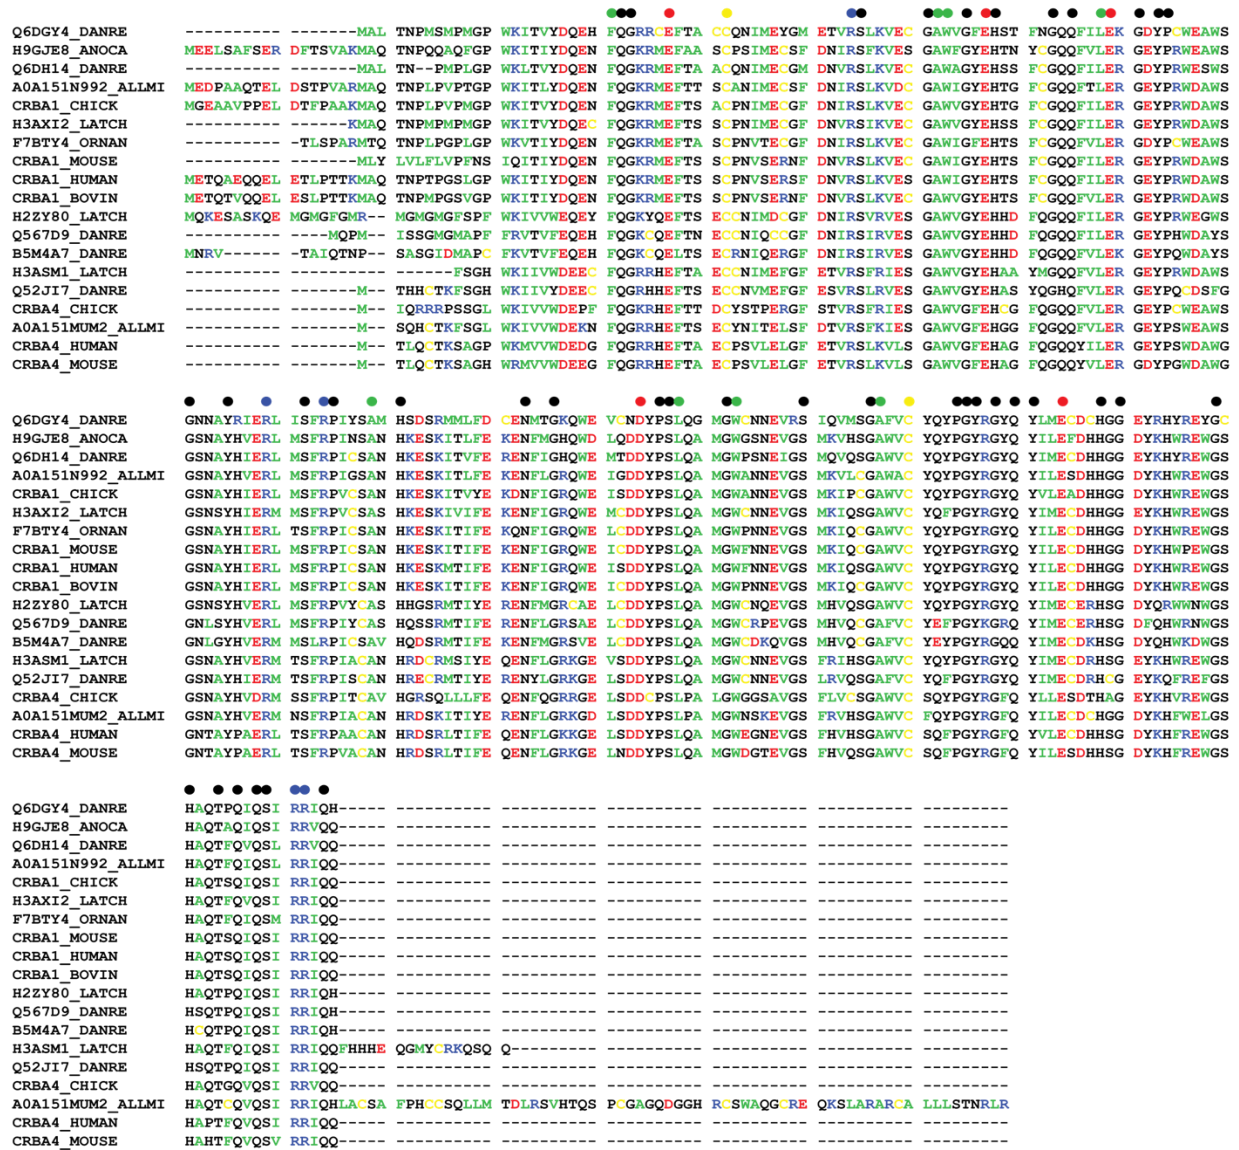

Figure S8. Sequence alignment for  $\beta$ -crystallin Cluster 2 ( $\beta$ A4-crystallins).

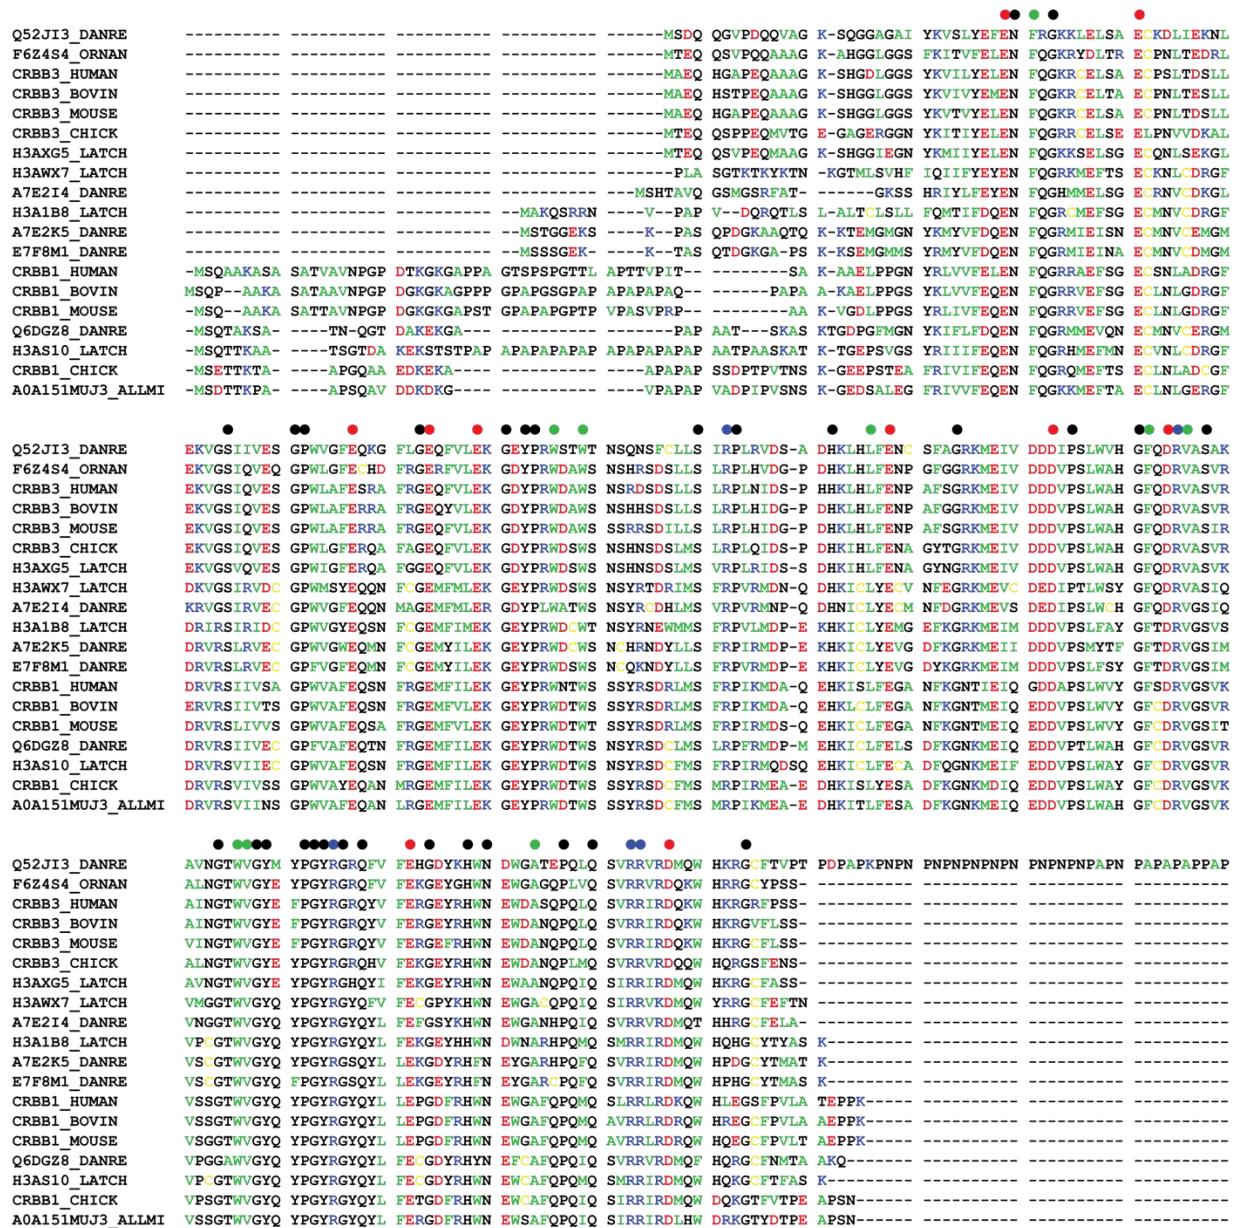

**Figure S9.** Sequence alignment for  $\beta$ -crystallin Cluster 3 ( $\beta$ B1- and  $\beta$ B3-crystallins). Q52JI3\_DANRE has an additional 7 amino acids (SATAASS) that were truncated to limit the figure to one page.

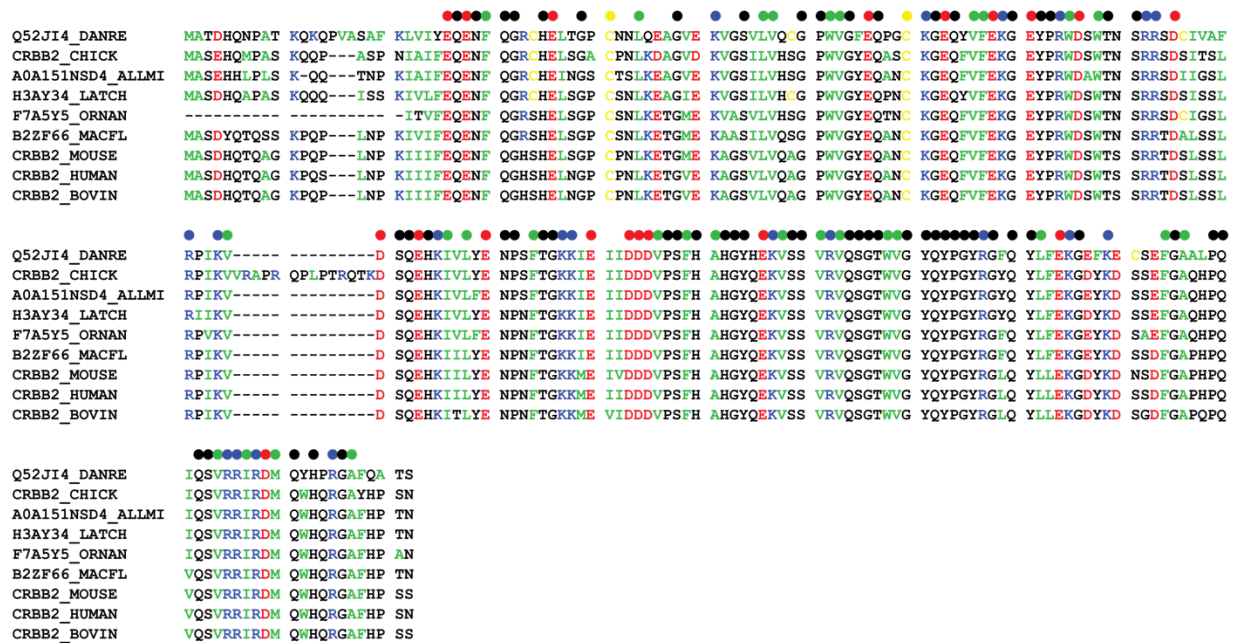

**Figure S10.** Sequence alignment for  $\beta$ -crystallin Cluster 4 ( $\beta$ 2-crystallins).
